# Supplementary material for: Using Front-Face Fluorescence Spectroscopy and Biochemical Analysis of Honey to Assess a Marker for the Level of Varroa destructor Infestation of Honey Bee (Apis mellifera) Colonies
Source: MDPI journal article supplement (doi:10.3390/foods12030629), 2023-02-02
Supplement: s1 [file s1]

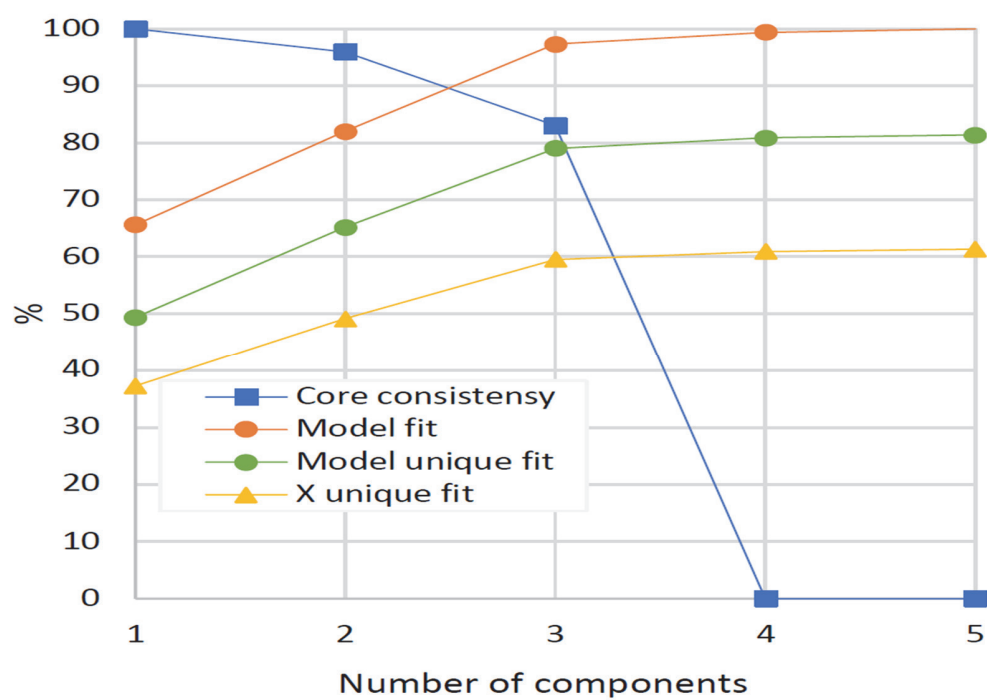

Figure S1. Core consistency and percent of explained variance expressed as model fit, model unique fit and unique fit of X, for five PARAFAC models with number of components increasing from 1 to 5.

Table S1. Concentrations of different pollen types which dominate in honey samples from the beehives of different infestation level with *V. destructor*

[illegible]
